# Supplementary material for: Multigene Phylogeny Reveals Endophytic Xylariales Novelties from Dendrobium Species from Southwestern China and Northern Thailand
Source: MDPI journal article supplement (doi:10.3390/jof8030248), 2022-02-28
Supplement: s1 [file s1]

## Supplementary Tables

Table S1. Strains used for phylogenetic tree construction in Apiosporaceae (*Arthrinium* and *Nigrospora*).

| Species                             | Strain                | GenBank Accession No. |          |          |                | Reference                 |
|-------------------------------------|-----------------------|-----------------------|----------|----------|----------------|---------------------------|
|                                     |                       | ITS                   | LSU      | TUB2     | TEF1- $\alpha$ |                           |
| <i>Apiospora aquaticum</i>          | <b>MFLU 18-1628</b>   | MK828608              | MK835806 | –        | –              | Luo et al. 2019           |
| <i>Apiospora arundinis</i>          | CBS 124788            | KF144885              | KF144929 | KF144975 | KF145017       | Crous and Groenewald 2013 |
|                                     | LC4951                | KY494698              | KY494774 | KY705168 | KY705097       | Wang et al. 2018          |
| <i>Apiospora aureum</i>             | <b>CBS 244.83</b>     | AB220251              | KF144935 | KF144981 | KF145023       | Crous and Groenewald 2013 |
| <i>Apiospora balearicum</i>         | <b>CBS 145129</b>     | MK014869              | MK014836 | MK017975 | –              | Pintos et al. 2019        |
| <i>Apiospora bambusae</i>           | <b>CGMCC 3.18335</b>  | KY494718              | KY494794 | KY705186 | KY806204       | Wang et al. 2018          |
|                                     | LC7107                | KY494719              | KY494795 | KY705187 | KY705117       | Wang et al. 2018          |
| <i>Apiospora bambusicola</i>        | <b>MFLUCC 20-0144</b> | MW173030              | MW173087 | –        | MW183262       | Tang et al. 2020          |
| <i>Apiospora camelliae-sinensis</i> | <b>CGMCC 3.18333</b>  | KY494704              | KY494780 | KY705173 | KY705103       | Wang et al. 2018          |
|                                     | LC8181                | KY494761              | KY494837 | KY705229 | KY705157       | Wang et al. 2018          |
| <i>Apiospora chinense</i>           | <b>CFCC 53036</b>     | MK819291              | –        | MK818547 | MK818545       | Jiang et al. 2020         |
| <i>Apiospora chromolaenae</i>       | <b>MFLUCC 17-1505</b> | MT214342              | MT214436 | –        | –              | Mapook et al. 2020        |
| <i>Apiospora dendrobii</i>          | <b>MFLUCC 14-0152</b> | MZ463151              | MZ463192 |          |                | This study                |
| <i>Apiospora descalsii</i>          | <b>CBS 145130</b>     | MK014870              | MK014837 | MK017976 | –              | Pintos et al. 2019        |
| <i>Apiospora dichotomanthi</i>      | <b>CGMCC 3.18332</b>  | KY494697              | KY494773 | KY705167 | KY705096       | Wang et al. 2018          |
|                                     | LC8175                | KY494755              | KY494831 | KY705223 | KY705151       | Wang et al. 2018          |
| <i>Apiospora esporlense</i>         | <b>CBS 145136</b>     | MK014878              | MK014845 | MK017983 | MK017954       | Pintos et al. 2019        |

|                                  |                       |          |          |          |          |                              |
|----------------------------------|-----------------------|----------|----------|----------|----------|------------------------------|
| <i>Apiospora euphorbiae</i>      | IMI 285638b           | AB220241 | AB220335 | AB220288 | –        | Ogawa et al. 2005            |
| <i>Apiospora gaoyouense</i>      | <b>CFCC 52301</b>     | MH197124 | –        | MH236789 | MH236793 | Jiang et al. 2020            |
| <i>Apiospora garethjonesii</i>   | KUMCC 16-0202         | KY356086 | KY356091 | –        | –        | Dai et al. 2016              |
| <i>Apiospora guizhouense</i>     | <b>CGMCC3.18334</b>   | KY494709 | KY494785 | KY705178 | KY705108 | Wang et al. 2018             |
|                                  | LC5318                | KY494708 | KY494784 | KY705177 | KY705107 | Wang et al. 2018             |
| <i>Arthrinium gutiae</i>         | <b>CBS 135835</b>     | KR011352 | MH877577 | KR011350 | KR011351 | Kajale et al. 2015           |
| <i>Apiospora hispanicum</i>      | <b>IMI 326877</b>     | AB220242 | AB220336 | AB220289 | –        | Ogawa et al. 2005            |
| <i>Apiospora hydei</i>           | <b>CBS 114990</b>     | KF144890 | KF144936 | KF144982 | KF145024 | Crous and<br>Groenewald 2013 |
|                                  | LC7103                | KY494715 | KY494791 | KY705183 | KY705114 | Crous and<br>Groenewald 2013 |
| <i>Apiospora hyphopodii</i>      | <b>MFLUCC 15-003</b>  | KR069110 | KY356093 | –        | –        | Dai et al. 2016              |
| <i>Apiospora hysterinum</i>      | ICMP 6889             | MK014874 | MK014841 | MK017980 | MK017951 | Pintos et al. 2019           |
| <i>Apiospora ibericum</i>        | <b>CBS 145137</b>     | MK014879 | MK014846 | MK017984 | –        | Pintos et al. 2019           |
| <i>Apiospora italicum</i>        | <b>AP221017</b>       | MK014880 | MK014847 | MK017985 | MK017956 | Pintos et al. 2019           |
| <i>Apiospora jatrophae</i>       | <b>MMI 00052</b>      | JQ246355 | –        | –        | –        | Sharma et al. 2012           |
| <i>Apiospora jiangxiense</i>     | <b>CGMCC 3.18381</b>  | KY494693 | KY494769 | KY705163 | KY705092 | Wang et al. 2018             |
|                                  | LC4578                | KY494694 | KY494770 | KY705164 | KY705093 | Wang et al. 2018             |
| <i>Apiospora kogelbergense</i>   | <b>CBS 113333</b>     | KF144892 | KF144938 | KF144984 | KF145026 | Crous and<br>Groenewald 2013 |
|                                  | CBS 113332            | KF144891 | KF144937 | KF144983 | KF145025 | Crous and<br>Groenewald 2013 |
| <i>Apiospora locuta-pollinis</i> | <b>LC11683</b>        | MF939595 | –        | MF939622 | MF939616 | Zhao et al. 2017             |
| <i>Apiospora longistromum</i>    | <b>MFLUCC 11-0481</b> | KU940141 | KU863129 | –        | –        | Dai et al. 2016              |
|                                  | MFLUCC 11-0479        | KU940142 | KU863130 | –        | –        | Dai et al. 2016              |

|                                        |                       |          |          |          |          |                           |
|----------------------------------------|-----------------------|----------|----------|----------|----------|---------------------------|
| <i>Apiospora malaysianum</i>           | <b>CBS 102053</b>     | KF144896 | KF144942 | KF144988 | KF145030 | Crous and Groenewald 2013 |
| <i>Apiospora marii</i>                 | <b>CBS 497.90</b>     | AB220252 | KF144947 | KF144993 | KF145035 | Ogawa et al. 2005         |
| <i>Apiospora mediterranei</i>          | <b>IMI 326875</b>     | AB220243 | AB220337 | AB220290 | –        | Ogawa et al. 2005         |
| <i>Apiospora mytilomorphum</i>         | <b>DAOM 214595</b>    | KY494685 | –        | –        | –        | Wang et al. 2018          |
| <i>Apiospora neogarethjonesii</i>      | <b>KUMCC 18-0192</b>  | MK070897 | MK070898 | –        | –        | Dai et al. 2019           |
| <i>Apiospora neosubglobosum</i>        | <b>KUMCC 16-0203</b>  | KY356090 | KY356095 | –        | –        | Dai et al. 2016           |
|                                        | JHB006                | KY356089 | KY356094 | –        | –        | Dai et al. 2016           |
| <i>Apiospora obovatum</i>              | <b>CGMCC 3.18331</b>  |          | –        | –        | –        | Wang et al. 2018          |
|                                        | LC8177                | KY494757 | KY494833 | KY705226 | KY705154 | Wang et al. 2018          |
| <i>Apiospora ovatum</i>                | <b>CBS 115042</b>     | KF144903 | KF144950 | KF144995 | KF145037 | Crous and Groenewald 2013 |
| <i>Apiospora paraphaeospermum</i>      | MFLUCC 13-0644        | KX822128 | KX822124 | –        | –        | Senanayake et al. 2016    |
| <i>Apiospora phaeospermum</i>          | CBS 114314            | KF144904 | KF144951 | KF144996 | KF145038 | Crous and Groenewald 2013 |
| <i>Apiospora phaeospermum</i>          | CBS 114315            | KF144905 | KF144952 | KF144997 | KF145039 | Crous and Groenewald 2013 |
| <i>Apiospora phragmitis</i>            | <b>CPC 18900</b>      | KF144909 | KF144956 | KF145001 | KF145043 | Crous and Groenewald 2013 |
| <i>Apiospora piptatheri</i>            | <b>CBS 145149</b>     | MK014893 | MK014860 | –        | –        | Pintos et al. 2019        |
| <i>Apiospora phyllostachium</i>        | <b>MFLUCC 18-1101</b> | MK351842 | MH368077 | MK291949 | MK340918 | Yang et al. 2019          |
| <i>Apiospora pseudoparenchymaticum</i> | <b>LC7234</b>         | KY494743 | KY494819 | KY705211 | KY705139 | Wang et al. 2018          |
|                                        | LC8173                | KY494753 | KY494829 | KY705221 | KY705149 | Wang et al. 2018          |
| <i>Apiospora pseudosinense</i>         | <b>CPC 21546</b>      | KF144910 | KF144957 | –        | KF145044 | Crous and Groenewald 2013 |

|                                    |                       |          |          |          |          |                           |
|------------------------------------|-----------------------|----------|----------|----------|----------|---------------------------|
| <i>Apiospora pseudospegazzinii</i> | <b>CBS 102052</b>     | KF144911 | KF144958 | KF145002 | KF145045 | Crous and Groenewald 2013 |
| <i>Apiospora pterospermum</i>      | <b>CPC 20193</b>      | KF144913 | KF144960 | KF145004 | KF145046 | Crous and Groenewald 2013 |
| <i>Apiospora qinlingense</i>       | <b>CFCC 52303</b>     | MH197120 | –        | MH236791 | MH236795 | Jiang et al. 2020         |
| <i>Apiospora rasikravindrae</i>    | <b>NFCCI 2144</b>     | JF326454 | –        | –        | –        | Schoch et al. 2014        |
|                                    | LC5449                | KY494713 | KY494789 | KY705182 | KY705112 | Wang et al. 2018          |
| <i>Apiospora sacchari</i>          | CBS 212.30            | KF144916 | AB220351 | KF145005 | KF145047 | Crous and Groenewald 2013 |
|                                    | CBS 301.49            | KF144917 | AB220352 | KF145006 | KF145048 | Crous and Groenewald 2013 |
| <i>Apiospora saccharicola</i>      | CBS 334.86            | AB220257 | KF144967 | KF145010 | KF145052 | Crous and Groenewald 2013 |
|                                    | CBS 463.83            | KF144921 | KF144968 | KF145011 | KF145053 | Crous and Groenewald 2013 |
| <i>Apiospora serenense</i>         | <b>IMI 326869</b>     | AB220250 | AB220344 | AB220297 | –        | Ogawa et al. 2005         |
| <i>Apiospora setostromum</i>       | <b>KUMCC 19-0217</b>  | MN528012 | MN528011 | –        | MN527357 | Jiang et al. 2019         |
| <i>Apiospora subglobosum</i>       | <b>MFLUCC 11-0397</b> | KR069112 | KR069113 | –        | –        | Senanayake et al. 2015    |
| <i>Apiospora subroseum</i>         | <b>CGMCC3.18337</b>   | KY494752 | KY494828 | KY705220 | KY705148 | Wang et al. 2018          |
|                                    | LC7291                | KY494751 | KY494827 | KY705219 | KY705147 | Wang et al. 2018          |
| <i>Apiospora thailandicum</i>      | <b>MFLUCC 15-0202</b> | KU940145 | KU863133 | –        | –        | Dai et al. 2016           |
|                                    | LC5630                | KY494714 | KY494790 | KY806200 | KY705113 | Wang et al. 2018          |
| <i>Apiospora vietnamensis</i>      | <b>IMI 99670</b>      | KX986096 | KX986111 | KY019466 | –        | Wang et al. 2018          |
| <i>Apiospora xenocordella</i>      | <b>CBS 478.86</b>     | KF144925 | –        | KF145013 | KF145055 | Crous and Groenewald 2013 |

|                                                    |                       |          |          |              |          |                           |
|----------------------------------------------------|-----------------------|----------|----------|--------------|----------|---------------------------|
| <i>Apiospora xenocordella</i>                      | CBS 595.66            | KF144926 | KF144971 | –            | –        | Crous and Groenewald 2013 |
| <i>Apiospora yunnanum</i>                          | <b>MFLUCC 15-0002</b> | KU940147 | KU863135 | –            | –        | Dai et al. 2016           |
| <i>Arthrinium austriacum</i>                       | GZU 345006            | MW208929 | MW208860 | –            | –        | Pintos and Alvarado 2021  |
| <i>Arthrinium caricicola</i>                       | AP23518               | MK014871 | MK014838 | MK017977     | MK017948 | Pintos et al. 2019        |
| <i>Arthrinium crenatum</i>                         | <b>CBS 146353</b>     | MW208931 | MW208861 | MW22192<br>3 | MW221917 | Pintos and Alvarado 2021  |
| <i>Arthrinium curvatum</i> var.<br><i>curvatum</i> | AG191036              | MW208935 | MW208862 | MW22192<br>4 | –        | Pintos and Alvarado 2021  |
| <i>Arthrinium curvatum</i> var.<br><i>minus</i>    | AP25418               | MK014872 | MK014839 | MK017978     | MK017949 | Pintos et al. 2019        |
| <i>Arthrinium japonicum</i>                        | IFO 31098             | AB220264 | AB220358 | AB220311     | –        | Ogawa et al. 2005         |
| <i>Arthrinium luzulae</i>                          | AP7619-3              | MW208937 | MW208863 | MW22192<br>5 | MW221919 | Pintos and Alvarado 2021  |
| <i>Arthrinium morthieri</i>                        | GZU 345043            | MW208938 | MW208864 | MW22192<br>6 | MW221920 | Pintos and Alvarado 2021  |
| <i>Arthrinium sphaerospermum</i>                   | AP25619               | MW208943 | MW208865 | –            | –        | Pintos and Alvarado 2021  |
| <i>Arthrinium sporophleoides</i>                   | GZU 345102            | MW208944 | MW208866 | –            | MW208866 | Pintos and Alvarado 2021  |
| <i>Arthrinium sporophleum</i>                      | AG19067               | MW208945 | –        | MW22192<br>8 | MW221921 | Pintos and Alvarado 2021  |
| <i>Arthrinium trachycarpum</i>                     | <b>CFCC 53038</b>     | MK301098 | –        | MK303394     | MK303396 | Jiang et al. 2020         |
| <i>Arthrinium urticae</i>                          | IMI 326344            | AB220245 | AB220339 | AB220292     | –        | Ogawa et al. 2005         |
| <i>Nigrospora aurantiaca</i>                       | <b>CGMCC 3.18130</b>  | KX986064 | KX986098 | KY019465     | KY019295 | Wang et al. 2018          |
|                                                    | LC7034                | KX986093 | –        | KY019598     | KY019394 | Wang et al. 2018          |

|                                      |                      |          |          |          |          |                  |
|--------------------------------------|----------------------|----------|----------|----------|----------|------------------|
| <i>Nigrospora bambusae</i>           | <b>CGMCC 3.18327</b> | KY385307 | –        | KY385319 | KY385313 | Dai et al. 2016  |
|                                      | LC7244               | KY385306 | –        | KY385320 | KY385314 | Wang et al. 2017 |
| <i>Nigrospora camelliae-sinensis</i> | <b>CGMCC 3.18125</b> | KX985986 | KX986103 | KY019460 | KY019293 | Wang et al. 2017 |
|                                      | LC4460               | KX986015 | –        | KY019538 | KY019353 | Wang et al. 2017 |
| <i>Nigrospora chinensis</i>          | <b>CGMCC 3.18127</b> | KX986023 | KX986107 | KY019462 | KY019422 | Wang et al. 2017 |
|                                      | LC4593               | KX986024 | –        | KY019546 | KY019443 | Wang et al. 2017 |
|                                      | MFLUCC 14-0109       | MZ463152 | MZ463193 | –        |          | This study       |
|                                      | MFLUCC 18-1215       | MZ463150 | MZ463191 | –        |          | This study       |
| <i>Nigrospora gorlenkoana</i>        | <b>CBS 480.73</b>    | KX986048 | KX986109 | KY019456 | KY019420 | Wang et al. 2017 |
| <i>Nigrospora guilinensis</i>        | LC7301               | KX986063 | –        | KY019608 | KY019404 | Wang et al. 2017 |
| <i>Nigrospora hainanensis</i>        | <b>CGMCC 3.18129</b> | KX986091 | KX986112 | KY019464 | KY019415 | Wang et al. 2017 |
|                                      | LC6979               | KX986079 | –        | KY019586 | KY019416 | Wang et al. 2017 |
| <i>Nigrospora laticolonia</i>        | <b>CGMCC 3.18123</b> | KX985978 | KX986105 | KY019458 | KY019291 | Wang et al. 2017 |
|                                      | LC7009               | KX986087 | –        | KY019594 | KY019454 | Wang et al. 2017 |
| <hr/>                                |                      |          |          |          |          |                  |
| <i>Nigrospora musae</i>              | <b>CBS 319.34</b>    | KX986076 | KX986110 | KY019455 | KY019419 | Wang et al. 2017 |
|                                      | LC6385               | KX986042 | –        | KY019567 | KY019371 | Wang et al. 2017 |
| <i>Nigrospora oryzae</i>             | LC6759               | KX986054 | –        | KY019572 | KY019374 | Wang et al. 2017 |
|                                      | LC6760               | KX986055 | –        | KY019573 | KY019375 | Wang et al. 2017 |
| <i>Nigrospora osmanthi</i>           | <b>CGMCC 3.18126</b> | KX986010 | KX986106 | KY019461 | KY019421 | Wang et al. 2017 |
|                                      | LC4487               | KX986017 | –        | KY019540 | KY019438 | Wang et al. 2017 |
| <i>Nigrospora pyriformis</i>         | <b>CGMCC 3.18122</b> | KX985940 | KX986100 | KY019457 | KY019290 | Wang et al. 2017 |
|                                      | LC2688               | KX985941 | –        | KY019468 | KY019297 | Wang et al. 2017 |
| <i>Nigrospora rubi</i>               | <b>CGMCC 3.18326</b> | KX985948 | KX986102 | KY019475 | KY019302 | Wang et al. 2017 |
| <i>Nigrospora sphaerica</i>          | <b>LC13523</b>       | MN215807 | –        | MN329970 | MN264046 | Wang et al. 2017 |

|                                       |                      |          |          |          |          |                  |
|---------------------------------------|----------------------|----------|----------|----------|----------|------------------|
|                                       | LC7295               | KX985933 | –        | KY019603 | KY019398 | Wang et al. 2017 |
|                                       | GZAC O37S13          | MZ463153 | –        | –        |          |                  |
| <i>Nigrospora</i> sp. 1               | LC2725               | KX985960 | KX986104 | KY019487 | KY019313 | Wang et al. 2017 |
| <i>Nigrospora</i> sp. 1               | LC4566               | KX986022 | –        | KY019545 | KY019354 | Raza et al. 2019 |
| <i>Nigrospora</i> sp. 2               | LC6704               | KX986047 | KX986108 | KY019571 | KY019373 | Wang et al. 2017 |
| <i>Nigrospora vesicularis</i>         | <b>CGMCC 3.18128</b> | KX986088 | KX986099 | KY019463 | KY019294 | Wang et al. 2017 |
|                                       | LC0322               | KX985939 | –        | KY019467 | KY019296 | Wang et al. 2017 |
| <i>Nigrospora zimmermanii</i>         | <b>CBS 290.62</b>    | KY385309 | –        | KY385317 | KY385311 | Wang et al. 2017 |
|                                       | CBS 984.69           | KY385310 | –        | KY385322 | KY385316 | Wang et al. 2017 |
| <i>Pseudomassaria corni</i>           | MFLUCC 14-0544       | KR092791 | –        | –        | –        | Wang et al. 2017 |
| <i>Pseudomassaria chondrospora</i>    | MFLUCC 14-0545       | KR092790 | KR092779 | –        | –        | Wang et al. 2017 |
| <i>Pseudomassaria sepincoliformis</i> | CBS 129022           | JF440984 | –        | –        | –        | Wang et al. 2017 |

Table S2. Strains used for phylogenetic tree construction in related Xylariaceae

| Species                            | Strains                | GenBank Accession No. |          |          |          | Reference           |
|------------------------------------|------------------------|-----------------------|----------|----------|----------|---------------------|
|                                    |                        | ITS                   | LSU      | TUB2     | RPB2     |                     |
| <i>Alloanthostomella rubicola</i>  | MFLUCC 16-0479         | KX533455              | KX533456 | KX789494 | KX789493 | Bitzer et al. 2008  |
| <i>Amphirosellinia fushanensis</i> | <b>91111209 (HAST)</b> | NR153514              | —        | GQ495950 | GQ848339 | Hsieh et al. 2010   |
| <i>Amphirosellinia nigrospora</i>  | <b>91092308 (HAST)</b> | NR153513              | —        | GQ495951 | GQ848340 | Hsieh et al. 2010   |
| <i>Annulohypoxyylon annulatum</i>  | <b>CBS 140775</b>      | NR153579              | KY610418 | KX376353 | KY624263 | Sir et al. 2016     |
| <i>Annulohypoxyylon areolatum</i>  | <b>MFLUCC 14-1233</b>  | KX376327              | —        | KX376344 | —        | Kuhnert et al. 2017 |
| <i>Annulohypoxyylon atroroseum</i> | ATCC 76081             | AF201712              | KY610422 | DQ840083 | KY624233 | Wendt et al. 2018   |

|                                           |                       |          |          |          |          |                        |
|-------------------------------------------|-----------------------|----------|----------|----------|----------|------------------------|
| <i>Annulohypoxyylon bahnpheadengense</i>  | STMA 13115            | KX376338 | —        | KX376347 | —        | Kuhnert et al. 2017    |
| <i>Annulohypoxyylon cf. truncatum</i>     | EKTX140201            | KX376331 | —        | KX376351 | —        | Kuhnert et al. 2017    |
| <i>Annulohypoxyylon elevatidiscus</i>     | <b>BCRC34014</b>      | —        | —        | AY951656 | —        | Hsieh et al. 2005      |
| <i>Annulohypoxyylon fulvum</i>            | <b>MUCL 54617</b>     | KX376336 | —        | KX376355 | —        | Kuhnert et al. 2017    |
| <i>Annulohypoxyylon ilanense</i>          | YMJ 37                | —        | —        | AY951657 | —        | Hsieh et al. 2005      |
| <i>Annulohypoxyylon leptascum</i>         | MFLUCC 13-0587        | KU604576 | —        | KU604580 | —        | Sir et al. 2016        |
| <i>Annulohypoxyylon massivum</i>          | <b>MUCL 47218</b>     | AM749938 | —        | KC977276 | —        | Bitzer et al. 2008     |
| <i>Annulohypoxyylon michelianum</i>       | CBS 119993            | KX376320 | KY610423 | KX271239 | KY624234 | Wendt et al. 2018      |
| <i>Annulohypoxyylon microdiscum</i>       | BCRC34018             | EF026137 | —        | —        | AY951660 | Kuhnert et al. 2017    |
| <i>Annulohypoxyylon moniliformis</i>      | <b>MFLUCC 18-1214</b> | MZ463121 | —        | MZ998970 | —        | This study             |
| <i>Annulohypoxyylon moriforme</i>         | CBS 123579            | KU683751 | KY610425 | KX271261 | KU684279 | U'Ren et al. 2016      |
| <i>Annulohypoxyylon nitens</i>            | <b>MFLUCC 12-0823</b> | KJ934991 | KJ934992 | KJ934993 | KJ934994 | Daranagama et al. 2015 |
| <i>Annulohypoxyylon nouraguense</i>       | <b>MUCL 54607</b>     | KX376335 | —        | KX376348 | —        | Kuhnert et al. 2017    |
| <i>Annulohypoxyylon purpureopigmentum</i> | MUCL 54616            | KC968942 | —        | KC977306 | —        | Kuhnert et al. 2014    |
| <i>Annulohypoxyylon squamulosum</i>       | <b>BCRC34022</b>      | EF026139 | —        | AY951665 | —        | Hsieh et al. 2005      |
| <i>Annulohypoxyylon stygium</i>           | MUCL 54601            | KY610409 | KY610475 | KX271263 | KY624292 | Wendt et al. 2018      |
| <i>Annulohypoxyylon substygium</i>        | STMA 14066            | KU604575 | —        | KU159526 | —        | Sir et al. 2016        |
| <i>Annulohypoxyylon thailandicum</i>      | <b>MFLUCC 13-0118</b> | KP744434 | KP744476 | KX376349 | —        | Liu et al. 2015        |
| <i>Annulohypoxyylon truncatum</i>         | <b>CBS 140778</b>     | NR153580 | KY610419 | KX376352 | KY624277 | Wendt et al. 2018      |
|                                           | EKTX14006             | KX376329 | —        | KX376352 | —        | Kuhnert et al. 2017    |



|                                          |                       |          |          |          |          |                         |
|------------------------------------------|-----------------------|----------|----------|----------|----------|-------------------------|
| <i>Annulohypoxyton urceolatum</i>        | YMJ 92090413          | —        | —        | AY951670 | —        | Hsieh et al. 2005       |
| <i>Annulohypoxyton violaceopigmentum</i> | <b>MFLUCC 14-1225</b> | KX376326 | —        | KX376343 | —        | Kuhnert et al. 2017     |
| <i>Annulohypoxyton viridistratum</i>     | <b>MFLUCC 14-1224</b> | KX376325 | —        | KX376342 | —        | Kuhnert et al. 2017     |
| <i>Annulohypoxyton yungensis</i>         | STMA 14049            | KX376324 | —        | KX376341 | —        | Kuhnert et al. 2017     |
| <i>Anthocanalis sparti</i>               | <b>MFLUCC 14-0557</b> | KP297395 | KP340537 | KP406606 | KP340523 | Daranagama et al. 2015  |
| <i>Anthostomella eucalyptorum</i>        | CBS 120036            | DQ890026 | —        | —        | —        | Crous et al. 2006       |
| <i>Anthostomella helicofissa</i>         | <b>MFLUCC 14-0173</b> | KP297406 | —        | KP406617 | KP340534 | Daranagama et al. 2015  |
| <i>Anthostomelloides krabiensis</i>      | <b>MFLUCC 15-0678</b> | KX305927 | KX305928 | —        | KX305929 | Tibpromma et al. 2017   |
| <i>Anthostomelloides leucospermi</i>     | <b>CBS 110126</b>     | NR153510 | —        | —        | —        | Marincowitz et al. 2008 |
| <i>Astrocystis concavispora</i>          | <b>MFLUCC 14-0174</b> | KP297404 | KP340545 | KP406615 | KP340532 | Daranagama et al. 2015  |
| <i>Barrmaelia macrospora</i>             | BM                    | KC774566 | —        | MF489014 | MF488995 | Voglmayr et al. 2017    |
| <i>Biscogniauxia arima</i>               | <b>WSP 122</b>        | EF026150 | —        | AY951672 | GQ304736 | Hsieh et al.2010        |
| <i>Biscogniauxia atropunctata</i>        | YMJ 128               | JX507799 | —        | AY951673 | JX507778 | Hsieh et al. 2012       |
| <i>Biscogniauxia marginata</i>           | <b>MFLUCC 12-0740</b> | KJ958407 | KJ958408 | KJ958406 | KJ958409 | Daranagama et al. 2015  |
| <i>Biscogniauxia nummularia</i>          | <b>MUCL 51395</b>     | KY610382 | KY610427 | KX271241 | KY624236 | Wendt et al. 2018       |
| <i>Biscogniauxia repanda</i>             | ATCC 62606            | KY610383 | KY610428 | KX271242 | KY624237 | Wendt et al. 2018       |
| <i>Brunnelperidium gracilentum</i>       | <b>MFLUCC 14-0011</b> | KP297400 | KP340542 | KP406611 | KP340528 | Daranagama et al. 2015  |
| <i>Brunneiperidium involucreatum</i>     | <b>MFLUCC 14-0009</b> | KP297399 | KP340541 | KP406610 | KP340527 | Daranagama et al. 2015  |
| <i>Camillea obularia</i>                 | ATCC 28093            | KY610384 | KY610429 | KX271243 | KY624238 | Wendt et al. 2018       |
| <i>Camillea tinctor</i>                  | YMJ 363               | JX507806 | —        | JX507795 | JX507790 | Wendt et al. 2018       |
| <i>Clypeosphaeria mamillana</i>          | <b>CBS 140735</b>     | KT949897 | MH554225 | MH704637 | MF489001 | Jaklitsch et al. 2016   |
| <i>Collodiscula bambusae</i>             | <b>GZU H0102</b>      | KP054279 | KP054280 | KP276674 | KP276675 | Li et al. 2015          |
| <i>Collodiscula fangjingshanensis</i>    | <b>GZUH0109</b>       | KR002590 | NG058915 | KR002589 | KR002592 | Li et al. 2015          |

|                                |                   |          |          |          |          |                        |
|--------------------------------|-------------------|----------|----------|----------|----------|------------------------|
| <i>Collodiscula japonica</i>   | CBS 124266        | JF440974 | MH874889 | KY624316 | KY624273 | Wendt et al. 2018      |
| <i>Daldinia andina</i>         | <b>CBS 114736</b> | KU684017 | KY610430 | KC977259 | KY624239 | Wendt et al. 2018      |
| <i>Daldinia bambusicola</i>    | <b>CBS 122872</b> | NR152464 | KY610431 | AY951688 | KY624241 | Wendt et al. 2018      |
|                                | MFLUCC 11-0605    | KU940155 | KU863143 | —        | KU940181 | Dai et al. 2016        |
| <i>Daldinia brachysperma</i>   | BCC 33676         | MN153854 | MN153871 | MN172205 | —        | Wongkanoun et al. 2019 |
| <i>Daldinia caldariorum</i>    | MUCL 49211        | AM749934 | KY610433 | KC977282 | KY624242 | Wendt et al. 2018      |
| <hr/>                          |                   |          |          |          |          |                        |
| <i>Daldinia Chiangdaoensis</i> | BCC 88221         | MN153851 | MN153868 | MN172198 | MN172209 | Wongkanoun et al. 2019 |
|                                | <b>BCC 88220</b>  | MN153850 | MN153867 | MN172197 | MN172208 | Wongkanoun et al. 2019 |
| <i>Daldinia childiae</i>       | <b>CBS 122881</b> | MH863249 | MH874773 | KU684129 | KU684290 | U'Ren et al. 2016      |
| <i>Daldinia concentrica</i>    | CBS 113277        | AY616683 | KY610434 | KC977274 | KY624243 | Wendt et al. 2018      |
| <i>Daldinia decipiens</i>      | <b>CBS 122879</b> | MH863247 | MH874771 | AY951694 | —        | Vu et al. 2019         |
| <i>Daldinia dennisii</i>       | <b>CBS 114741</b> | MH862968 | MH874530 | KC977262 | KY624244 | Wendt et al. 2018      |
| <i>Daldinia eschscholtzii</i>  | MUCL 45435        | JX658484 | KY610437 | KC977266 | KY624246 | Wendt et al. 2018      |
| <i>Daldinia flavogranulata</i> | BCC 89365         | MN153857 | MN153874 | MN172201 | MN172212 | Wongkanoun et al. 2019 |
| <i>Daldinia flavogranulata</i> | <b>BCC 89363</b>  | MN153856 | MN153873 | MN172200 | MN172211 | Wongkanoun et al. 2019 |
| <i>Daldinia loculatoides</i>   | <b>CBS 113279</b> | MH862918 | MH874491 | KX271246 | KY624247 | Wendt et al. 2018      |
| <i>Daldinia macaronesica</i>   | <b>CBS 113040</b> | JX658504 | KY610477 | KX271266 | KY624294 | Wendt et al. 2018      |
| <i>Daldinia petriniae</i>      | <b>MUCL 49214</b> | AM749937 | KY610439 | KC977261 | KY624248 | Wendt et al. 2018      |
| <i>Daldinia phadaengensis</i>  | BCC 89350         | MN153853 | MN153870 | MN172196 | MN172207 | Wongkanoun et al. 2019 |
|                                | <b>BCC 89349</b>  | MN153852 | MN153869 | MN172195 | MN172206 | Wongkanoun et al. 2019 |
| <i>Daldinia placentiformis</i> | MUCL 47603        | AM749921 | KY610440 | KC977278 | KY624249 | Wendt et al. 2018      |
| <i>Daldinia pyrenaica</i>      | MUCL 53969        | KY610413 | KY610413 | KY624312 | KY624274 | Wendt et al. 2018      |
| <i>Daldinia singularis</i>     | YMJ 120           | —        | —        | AY951700 | —        | Hsieh et al. 2005      |
| <i>Daldinia steglichii</i>     | <b>MUCL 43512</b> | KY610399 | KY610479 | KX271269 | KY624250 | Wendt et al. 2018      |

|                                        |                       |          |          |          |            |                           |
|----------------------------------------|-----------------------|----------|----------|----------|------------|---------------------------|
| <i>Daldinia theissenii</i>             | <b>CBS 113044</b>     | KY610388 | KY610441 | KX271247 | KY624251   | Wendt et al. 2018         |
| <i>Daldinia vernicosa</i>              | <b>CBS 119316</b>     | NR152501 | KY610442 | KC977260 | KY624252   | Wendt et al. 2018         |
| <i>Diatrype disciformis</i>            | <b>MFLUCC 15-0538</b> | AJ390410 | KR092784 | —        | —          | Senanayake et al. 2015    |
| <i>Durotheca comedens</i>              | <b>YMJ 90071615</b>   | EF026128 | —        | EF025613 | JX507793   | Ju et al. 2003            |
| <i>Durotheca crateriformis</i>         | <b>GMBC0205</b>       | MH645426 | MH645425 | MH049441 | MH645427   | Long et al. 2019          |
| <i>Durotheca depressa</i>              | <b>BCC23016</b>       | —        | —        | GQ160491 | —          | Læssøe et al. 2013        |
| <i>Durotheca eurima</i>                | <b>GMBC0060</b>       | MH645419 | MH645421 | MH049437 | MH645422   | Long et al. 2019          |
| <i>Durotheca guizhouensis</i>          | GMBC0206              | MH645429 | MH645430 | MH049446 | MH645431   | Long et al. 2019          |
| <i>Durotheca rogersii</i>              | <b>GMBC0204</b>       | MH645433 | MH645434 | MH049449 | MH645435   | Long et al. 2019          |
| <i>Euepixylon sphaeriosomum</i>        | <b>JDR 261</b>        | GU292821 | —        | GQ470224 | GQ844774.1 | Hsieh et al.2010          |
| <i>Entoleuca mammata</i>               | JDR 100               | GU300072 | —        | GQ470230 | GQ844782   | Hsieh et al.2010          |
| <i>Entosordaria perfidiosa</i>         | BW3                   | MF488992 | —        | MF489020 | MF489002   | Voglmayr et al. 2017      |
| <i>Graphostroma platystoma</i>         | <b>CBS 270.87</b>     | JX658535 | DQ836906 | HG934108 | KY624296   | Wendt et al. 2018         |
| <i>Hypocreodendron sanguineum</i>      | <b>JDR 169</b>        | GU322433 | —        | GQ487710 | GQ844819   | Hsieh et al.2010          |
| <i>Hypomontagnella barbarensis</i>     | <b>STMA 14081</b>     | MK131720 | MK131718 | MK135891 | MK135893   | Lambert et al. 2019       |
| <i>Hypomontagnella monticulosum</i>    | <b>MUCL 54604</b>     | KY610404 | KY610487 | KX271273 | KY624305   | Wendt et al. 2018         |
| <i>Hypomontagnella submonticulosum</i> | CBS 115280            | JX658449 | KY610457 | KC977267 | KY624226   | Wendt et al. 2018         |
| <i>Hypoxydon addis</i>                 | <b>MUCL 52797</b>     | KC968931 | —        | KC977287 | —          | Kuhnert et al. 2017       |
| <i>Hypoxydon aeruginosum</i>           | <b>MUCL 54620</b>     | KC968941 | —        | KC977305 | —          | Kuhnert et al. 2014       |
| <i>Hypoxydon argillaceum</i>           | CBS 527.63            | KU683764 | —        | KU684187 | KU684283   | U'Ren et al. 2016         |
| <i>Hypoxydon aff. rubiginosum</i>      | <b>MUCL 57724</b>     | MT214999 | MT214994 | MT212241 | MT212237   | Pourmoghaddam et al. 2020 |
| <i>Hypoxydon anthochroum</i>           | BCRC34050             | JN660819 | —        | AY951703 | —          | Hsieh et al. 2005         |

|                                          |                       |          |          |           |          |                            |
|------------------------------------------|-----------------------|----------|----------|-----------|----------|----------------------------|
| <i>Hypoxylon baihualingense</i>          | <b>H14</b>            | MG490190 | —        | MH790276  | —        | Ma et al. 2018             |
| <i>Hypoxylon baruense</i>                | <b>UCH9545</b>        | MN056428 | —        | MK908142. | —        | Cedeño–Sanchez et al. 2019 |
| <i>Hypoxylon begae</i>                   | BCRC 34051            | JN660820 | —        | AY951704  | —        | Hsieh et al. 2005          |
| <i>Hypoxylon bellicolor</i>              | <b>UCH9543</b>        | MN056425 | —        | —         | MK908139 | Cedeno-Sanchez et al. 2019 |
| <i>Hypoxylon brevisporum</i>             | BCRC33809             | JN660821 | —        | AY951705  | —        | Hsieh et al.2005           |
| <i>Hypoxylon calileguense</i>            | <b>STMA 14059</b>     | KU604566 | —        | KU604579  | —        | Sir et al. 2016            |
| <i>Hypoxylon carneum</i>                 | MUCL 54177            | KY610400 | KY610480 | KX271270  | KY624297 | Wendt et al. 2018          |
| <i>Hypoxylon cercidicola</i>             | CBS 119009            | KU683766 | KY610444 | KU684189  | KY624254 | Wendt et al. 2018          |
| <i>Hypoxylon</i> cf. <i>subticinense</i> | MUCL 53752            | KC968913 | —        | KC977297  | —        | Kuhnert et al. 2014        |
| <i>Hypoxylon chionostomum</i>            | STMA 14060            | KU604563 | —        | —         | —        | Sir et al. 2016            |
| <i>Hypoxylon cinnabarinum</i>            | YMJ 43                | JN979409 | —        | AY951709  | —        | Hsieh et al.2005           |
| <i>Hypoxylon crocopeplum</i>             | CBS 119004            | KC968907 | KY610445 | KC977268  | KY624255 | Wendt et al. 2018          |
| <i>Hypoxylon dieckmannii</i>             | BCRC34058             | JN979413 | —        | AY951712  | —        | Hsieh et al.2005           |
| <i>Hypoxylon duranii</i>                 | BCRC34060             | JN979414 | —        | AY951714  | —        | Hsieh et al.2005           |
| <i>Hypoxylon endophyticum</i>            | <b>MFLUCC 18-1206</b> | MZ463115 | MZ463160 | MZ998938  | MZ613967 | This study                 |
|                                          | MFLUCC 18-1209        | MZ463134 | MZ463177 | MZ998953  | MZ970698 | This study                 |
|                                          | MFLUCC 18-1211        | MZ463118 | MZ463163 | MZ998941  | MZ690490 | This study                 |
|                                          | <b>MFLUCC 18-1208</b> | MZ463131 | MZ463174 | MZ998950  | MZ970703 | This study                 |
|                                          | MFLUCC 18-1210        | MZ463137 | MZ463180 | MZ998956  | MZ970705 | This study                 |
|                                          | MUCL 53759            | KC968910 | —        | KC977296  | —        | Wendt et al. 2018          |
| <i>Hypoxylon fendleri</i>                | MUCL 54792            | KF234421 | KY610481 | KF300547  | KY624298 | Wendt et al. 2018          |
| <i>Hypoxylon ferrugineum</i>             | CBS 141259            | KX090079 | —        | KX090080  | —        | Friebes et al. 2016        |
| <i>Hypoxylon flavoargillaceum</i>        | STMA 14062            | KU604577 | —        | KU159532  | —        | Sir et al. 2016            |

|                                  |                       |          |          |          |          |                              |
|----------------------------------|-----------------------|----------|----------|----------|----------|------------------------------|
| <i>Hypoxylon fragiforme</i>      | <b>MUCL 51264</b>     | KM186294 | KM186295 | KM186293 | KM186296 | Wendt et al. 2018            |
|                                  | YMJ 387               | JN979419 | —        | AY951719 | —        | Hsieh et al. 2005            |
| <i>Hypoxylon fraxinophilum</i>   | <b>STMA 12011</b>     | KC968938 | —        | KC977301 | —        | Kuhnert et al. 2014          |
| <i>Hypoxylon fulvosulphureum</i> | <b>MFLUCC 13-0589</b> | KP401576 | —        | KP401584 | —        | Sir et al. 2016              |
| <i>Hypoxylon fuscopurpureum</i>  | BCRC34067             | JN979421 | —        | AY951721 | —        | Hsieh et al. 2005            |
| <i>Hypoxylon fuscum</i>          | <b>CBS 113049</b>     | KY610401 | KY610482 | KX271271 | KY624299 | Wendt et al. 2018            |
| <i>Hypoxylon gibriacense</i>     | <b>MUCL 52698</b>     | KC968930 | —        | AY951739 | —        | Kuhnert et al. 2014          |
| <i>Hypoxylon griseobrunneum</i>  | <b>CBS 331.73</b>     | KY610402 | MH872399 | KC977303 | KY624300 | Wendt et al. 2018            |
| <i>Hypoxylon guilanense</i>      | <b>MUCL 57726</b>     | MT214997 | MT214992 | MT212239 | MT212235 | Pourmoghaddam et al.<br>2020 |
| <i>Hypoxylon haematostroma</i>   | MUCL 47600            | AM749924 | KY610447 | KC977279 | KY624257 | Wendt et al. 2018            |
| <i>Hypoxylon hercoglossi</i>     | <b>MFLUCC 18-1207</b> | MZ463125 | MZ463168 | —        |          | This study                   |
| <i>Hypoxylon hinnuleum</i>       | <b>CBS 286.62</b>     | MH858152 | MH869746 | MK287575 | MK287562 | Sir et al. 2019              |
| <i>Hypoxylon howeanum</i>        | MUCL 47599            | AM749928 | KY610448 | KC977277 | KY624258 | Wendt et al. 2018            |
| <i>Hypoxylon hypomiltum</i>      | MUCL 51845            | KY610403 | KY610449 | KX271249 | KY624302 | Wendt et al. 2018            |
| <i>Hypoxylon investiens</i>      | CBS 118185            | FJ185308 | KY610451 | FJ185299 | KY624260 | Platas et al. 2009           |
|                                  | CBS 118183            | FJ185307 | KY610450 | FJ185298 | KY624259 | Platas et al. 2009           |
|                                  | YMJ 89062905          | JN979428 | —        | AY951730 | —        | Hsieh et al.2005             |
| <i>Hypoxylon isabellinum</i>     | <b>MUCL 53308</b>     | KC968935 | —        | KC977295 | —        | Kuhnert et al. 2014          |
| <i>Hypoxylon jaklitschii</i>     | <b>CBS 138916</b>     | KM610290 | —        | KM610304 | —        | Kuhnert et al. 2015          |
| <i>Hypoxylon jecorinum</i>       | YMJ 39                | JN979429 | —        | AY951731 | —        | Hsieh et al.2005             |
| <i>Hypoxylon lateripigmentum</i> | <b>MUCL 53304</b>     | NR155156 | KY610486 | KC977290 | KY624304 | Kuhnert et al. 2014          |
| <i>Hypoxylon lenormandii</i>     | CBS 119003            | KC968943 | KY610452 | KC977273 | KY624261 | Wendt et al. 2018            |
| <i>Hypoxylon lienhwacheense</i>  | MFLUCC 14-1231        | KU604558 | —        | KU159522 | —        | Sir et al. 2016              |
| <i>Hypoxylon lilloi</i>          | <b>STMA 14142</b>     | KU604574 | —        | KU159537 | —        | Sir et al. 2016              |

|                                    |                       |          |          |          |          |                     |
|------------------------------------|-----------------------|----------|----------|----------|----------|---------------------|
| <i>Hypoxylon liviae</i>            | <b>CBS 115282</b>     | KC968922 | —        | KC977265 | —        | Kuhnert et al. 2017 |
| <i>Hypoxylon lividicolor</i>       | <b>BCRC34076</b>      | JN979432 | —        | AY951734 | —        | Hsieh et al. 2005   |
| <i>Hypoxylon lividipigmentum</i>   | <b>BCRC34077</b>      | JN979433 | MG685777 | AY951735 | —        | Sir et al. 2016     |
| <i>Hypoxylon macrosporum</i>       | YMJ 47                | JN979434 | —        | AY951736 | —        | Hsieh et al. 2005   |
| <i>Hypoxylon moschaticum</i>       | <b>MFLUCC 15-1155</b> | MZ463149 | —        | MZ998968 |          | This study          |
| <i>Hypoxylon munkii</i>            | MUCL 53315            | KC968912 | —        | KC977294 | —        | Kuhnert et al. 2014 |
| <i>Hypoxylon musceum</i>           | MUCL 53765            | KC968926 | KY610488 | KC977280 | KY624306 | Wendt et al. 2018   |
| <i>Hypoxylon notatum</i>           | YJM 250               | JQ009305 | —        | AY951739 | —        | Hsieh et al. 2010   |
| <i>Hypoxylon ochraceum</i>         | <b>MUCL 54625</b>     | NR155158 | —        | KC977300 | KY624271 | Wendt et al. 2018   |
| <i>Hypoxylon officinalis</i>       | MFLUCC 14-0078        | MZ463109 | MZ463156 | MZ998933 | —        | This study          |
|                                    | <b>MFLUCC 14-0075</b> | MZ463108 | MZ463155 | MZ613966 | —        | This study          |
|                                    | MFLUCC 21-0060        | MZ463123 | —        | MZ998943 | MZ690492 | This study          |
| <i>Hypoxylon olivaceopigmentum</i> | <b>DSM 107924</b>     | MK287530 | MK287542 | MK287568 | MK287555 | Sir et al. 2019     |
| <i>Hypoxylon papillatum</i>        | <b>ATCC 58729</b>     | NR155153 | KY610454 | KC977258 | KY624223 | Wendt et al. 2018   |
| <i>Hypoxylon perforatum</i>        | CBS 115281            | AM749935 | KY610455 | KX271250 | KY624224 | Wendt et al. 2018   |
| <i>Hypoxylon petriniae</i>         | <b>CBS 114746</b>     | NR155185 | KY610491 | KX271274 | KY624279 | Wendt et al. 2018   |
| <i>Hypoxylon pilgerianum</i>       | YMJ 92042505          | JQ009310 | —        | AY951744 | KY624308 | Hsieh et al. 2005   |
| <i>Hypoxylon polyporoideum</i>     | BCRC34088             | JQ009311 | —        | AY951747 | —        | Hsieh et al. 2005   |
| <i>Hypoxylon polyporus</i>         | STMA 14090            | KU604570 | —        | KU159530 | —        | Sir et al. 2016     |
| <i>Hypoxylon porphyreum</i>        | CBS 119022            | KC968921 | KY610456 | KC977264 | KY624225 | Kuhnert et al. 2014 |
| <i>Hypoxylon pulicicidum</i>       | <b>MUCL 49879</b>     | JX183075 | —        | JX183072 | —        | Bills et al. 2012   |
|                                    | MUCL 53764            | JX183077 | —        | JX183073 | —        | Bills et al. 2012   |
|                                    | CBS 122622            | NG066188 | KY610492 | JX183074 | KY624280 | Wendt et al. 2018   |
|                                    | GZAC O37L14           | MZ463124 | MZ463167 | MZ998944 | MZ690493 | This study          |

|                                            |                   |          |          |          |          |                               |
|--------------------------------------------|-------------------|----------|----------|----------|----------|-------------------------------|
| <i>Hypoxylon rickii</i>                    | <b>MUCL 53309</b> | NR137115 | KY610416 | KC977288 | KY624281 | Wendt et al. 2018             |
| <i>Hypoxylon rubiginosum</i>               | <b>MUCL 52887</b> | NR155152 | KY610469 | KY624311 | KY624266 | Wendt et al. 2018             |
| <i>Hypoxylon rutilum</i>                   | YMJ 181           | —        | —        | AY951752 | —        | Hsieh et al. 2005             |
| <i>Hypoxylon samuelsii</i>                 | <b>MUCL 51843</b> | NR137159 | KY610466 | KC977286 | KY624269 | Wendt et al. 2018             |
| <i>Hypoxylon shearii</i> var. <i>minor</i> | <b>BCRC34093</b>  | EF026142 | —        | AY951753 | —        | Hsieh et al. 2005             |
| <i>Hypoxylon spegazzinianum</i>            | <b>STMA 14082</b> | KU604573 | —        | KU604582 | —        | Sir et al. 2016               |
| <i>Hypoxylon<br/>sporstriatatunicum</i>    | <b>UCH9542</b>    | MN056426 | —        | MK908140 | —        | Cedeno-Sanchez et al.<br>2019 |
| <i>Hypoxylon subgilvum</i>                 | YMJ 88113007      | JQ009314 | —        | AY951754 | —        | Hsieh et al. 2005             |
| <i>Hypoxylon sublenormandii</i>            | JF13026           | KM610291 | —        | KM610303 | —        | Kuhnert et al. 2015           |
| <i>Hypoxylon subrutiloides</i>             | F202416           | FJ185304 | —        | FJ185281 | —        | Platas et al. 2009            |
| <i>Hypoxylon texense</i>                   | <b>DSM 107933</b> | MK287536 | MK287548 | MK287574 | MK287561 | Kuhnert et al. 2017           |
| <i>Hypoxylon ticinense</i>                 | CBS 115271        | JQ009317 | KY610471 | AY951757 | KY610471 | Wendt et al. 2018             |
| <i>Hypoxylon trugodes</i>                  | <b>MUCL 54794</b> | KF234422 | KY610493 | KF300548 | KY624282 | Wendt et al. 2018             |
| <i>Hypoxylon ulmophilum</i>                | <b>YMJ 350</b>    | JQ009320 | —        | AY951760 |          | Hsieh et al. 2005             |
| <i>Hypoxylon vinosopulvinatum</i>          | <b>BCRC34101</b>  | JQ009321 | —        | AY951761 | —        | Hsieh et al. 2005             |
| <i>Hypoxylon vogesiacum</i>                | CBS 115273        | KY610417 | KY610417 | KX271275 | KY624283 | Wendt et al. 2018             |
| <i>Induratia alba</i>                      | <b>MONT 620</b>   | AF324336 | —        | —        | —        | Worapong et al. 2001          |
| <i>Induratia brasiliensis</i>              | <b>LGMF 1256</b>  | KY924494 | —        | —        | MF510171 | Pena et al., (2019)           |
| <i>Induratia camphorae</i>                 | <b>NFCCI 3236</b> | KC481681 | —        | —        | —        | Meshram et al. 2017           |
| <i>Induratia cinnamomi</i>                 | <b>BCC 38842</b>  | GQ848369 | —        | —        | —        | Suwannarach et al. 2010       |
| <i>Induratia coffeana</i>                  | <b>COAD 1842</b>  | KM514680 | —        | KM514681 | —        | Hongsanan et al. 2015         |
| <i>Induratia crispans</i>                  | <b>MONT 2347</b>  | EU195297 | —        | —        | —        | Suwannarach et al. 2010       |
| <i>Induratia equiseti</i>                  | <b>JCM 18233</b>  | JX089322 | —        | —        | —        | Suwannarach et al. 2013       |

|                                   |                       |               |          |          |          |                         |
|-----------------------------------|-----------------------|---------------|----------|----------|----------|-------------------------|
| <i>Induratia darjeelingensis</i>  | <b>NFCCI 3095</b>     | NFCCI<br>3095 | —        | —        | —        | Saxena et al. 2014      |
| <i>Induratia fengyangensis</i>    | ZJLQ024               | HM034855      | HM034861 | HM034842 | HM034851 | Zhang et al. 2010       |
| <i>Induratia ghoomensis</i>       | <b>NFCCI 3234</b>     | KF537625      | —        | —        | —        | Meshram et al. 2015     |
| <i>Induratia indica</i>           | <b>NFCCI 3235</b>     | KF537626      | —        | —        | —        | Meshram et al. 2015     |
| <i>Induratia kashayum</i>         | <b>NFCCI 2947</b>     | KC481680      | —        | —        | —        | Meshram et al. 2013     |
| <i>Induratia musae</i>            | <b>JCM 18230</b>      | JX089323      | —        | —        | —        | Suwannarach et al. 2010 |
| <i>Induratia oryzae</i>           | <b>JCM 18231</b>      | JX089321      | —        | —        | —        | Suwannarach et al. 2010 |
| <i>Induratia rosea</i>            | <b>MONT 2098</b>      | AY034665      | —        | —        | —        | Worapong et al. 2002    |
| <i>Induratia</i> sp.              | MFLUCC 15-1218        | MZ463110      | —        | —        | —        | This study              |
| <i>Induratia suthepensis</i>      | <b>JCM 18232</b>      | JN558830      | —        | —        | —        | Suwannarach et al. 2010 |
| <i>Induratia sutura</i>           | <b>MSUB 2380</b>      | JF938595      | —        | —        | —        | Kudalkar et al. 2012    |
| <i>Induratia thailandica</i>      | <b>MFLUCC 17-2669</b> | MK762707      | MK762714 | MK791283 | MK776960 | Samarakoon et al. 2020  |
| <i>Induratia tigerensis</i>       | <b>NFCCI 3172</b>     | JQ409998      | —        | —        | —        | Saxena et al. 2015      |
| <i>Induratia vitigena</i>         | <b>MONT P-15</b>      | AY100022      | —        | —        | —        | Daisy et al. 2002       |
| <i>Induratia yucatanensis</i>     | <b>MEXU 25511</b>     | FJ917287      | —        | —        | —        | González et al. 2009    |
| <i>Induratia yunnanensis</i>      | <b>CGMCC 3.18908</b>  | MG866046      | MG866038 | MG866059 | MG866066 | Chen et al. 2019        |
| <i>Induratia ziziphi</i>          | <b>MFLUCC 17-2662</b> | MK762705      | MK762712 | MK791281 | MK776958 | Samarakoon et al. 2020  |
| <i>Jackrogersella cohaerens</i>   | CBS 119126            | KC477233      | KY610497 | KY624314 | KY624270 | Wendt et al. 2018       |
| <i>Jackrogersella minutella</i>   | CBS 119015            | KY610381      | KY610424 | KX271240 | KY624235 | Wendt et al. 2018       |
| <i>Jackrogersella multiformis</i> | <b>CBS 119016</b>     | NR154784      | KT281893 | KX271262 | KY624290 | Wendt et al. 2018       |
| <i>Kretzschmaria clavus</i>       | YMJ 114               | EF026126      | —        | EF025611 | GQ844789 | Hsieh et al. 2010       |
| <i>Kretzschmaria deusta</i>       | CBS 163.93            | KC477237      | KY610458 | KX271251 | KY624227 | Wendt et al. 2018       |
| <i>Kretzschmaria guyanensis</i>   | 89062903 (HAST)       | GU300079      | —        | GQ478214 | GQ844792 | Hsieh et al. 2010       |
| <i>Kretzschmaria lucidula</i>     | YMJ 112               | EF026125      | —        | EF025610 | GQ844790 | Hsieh et al. 2010       |



|                                             |                        |          |          |          |          |                                 |
|---------------------------------------------|------------------------|----------|----------|----------|----------|---------------------------------|
| <i>Kretzschmaria neocaledonica</i>          | 94031003 (HAST)        | GU300078 | —        | GQ478213 | GQ844788 | Hsieh et al. 2010               |
| <i>Kretzschmaria pavementosa</i>            | YMJ 109                | GU300077 | —        | GQ478212 | GQ844787 | Hsieh et al. 2010               |
| <i>Kretzschmaria sandvicensis</i>           | YMJ 113                | GU300076 | —        | GQ478211 | GQ844786 | Hsieh et al. 2010               |
| <i>Kretzschmariella culmorum</i>            | JDR 88                 | KX430043 | —        | KX430046 | KX430045 | Fournier et al. 2018            |
| <i>Lopadostoma gastrinum</i>                | <b>CBS 134632</b>      | NR132030 | MH877560 | —        | —        | Vu et al. 2019                  |
| <i>Lopadostoma insulare</i>                 | <b>CBS 133214</b>      | NR132031 | —        | —        | —        | Jaklitsch et al. 2014           |
| <i>Lunatiannulus irregularis</i>            | <b>MFLUCC 14-0014</b>  | KP297398 | KP340540 | KP406609 | KP340526 | Daranagama et al. 2015          |
| <i>Natonodosa speciosa</i>                  | <b>CLM-RV86</b>        | MF380435 | MF380435 | —        | MH745150 | Heredia et al. 2020             |
| <i>Nemania abortiva</i>                     | <b>BISH467</b>         | GU292816 | —        | GQ470219 | KU684251 | Hsieh et al. 2010               |
| <i>Nemania aenea</i>                        | CBS 680.86             | AJ390427 | —        | —        | —        | Sanchez-Ballesteros et al. 2000 |
| <i>Nemania aenea</i> var. <i>aureolutea</i> | ATCC 60819             | AF201704 | —        | —        | —        | Pinto-Sherer et al. 2000        |
| <i>Nemania beaumontii</i>                   | 405 (HAST)             | GU292819 | —        | GQ470222 | GQ844772 | Hsieh et al. 2010               |
| <i>Nemania bipapillata</i>                  | 5336                   | JQ862691 | JQ862649 | JX868546 | —        | Chen et al. 2013                |
|                                             | 90080610 (HAST)        | GU292818 | —        | GQ470221 | GQ844771 | Hsieh et al. 2010               |
| <i>Nemania chestersii</i>                   | ATCC 38988             | AJ390430 | —        | DQ631949 | —        | Sanchez-Ballesteros et al. 2000 |
| <i>Nemania dendrobii</i>                    | <b>MFLUCC 18-1213</b>  | MZ463137 | MZ463181 | MZ998957 | MZ970708 | This study                      |
|                                             | <b>MFLUCC 18-1212</b>  | MZ463135 | MZ463178 | MZ998954 | MZ970699 | This study                      |
| <i>Nemania diffusa</i>                      | <b>91020401 (HAST)</b> | GU292817 | —        | GQ470220 | GQ844769 | Hsieh et al. 2010               |
|                                             | JZB3370003             | MT509577 | —        | —        | MT512901 | Manawasinghe et al. 2021        |
|                                             | MFLUCC 14-0139         | MZ463143 | MZ463185 | MZ998962 | —        | This study                      |
| <i>Nemania illita</i>                       | YMJ 236                | EF026122 | —        | EF025608 | —        | Hsieh et al. 2010               |
| <i>Nemania macrocarpa</i>                   | <b>CBS 109567</b>      | MH862830 | MH874423 | GQ470226 | GQ844776 | Vu et al. 2019                  |

|                                                  |                        |          |          |          |          |                                 |
|--------------------------------------------------|------------------------|----------|----------|----------|----------|---------------------------------|
| <i>Nemania maritima</i>                          | <b>89120401 (HAST)</b> | GU292822 | —        | GQ470225 | GQ844775 | Hsieh et al. 2010               |
| <i>Nemania orchidacearum</i>                     | <b>MFLUCC 14-0138</b>  | MZ463141 | MZ463183 | MZ998960 | MZ970706 | This study                      |
|                                                  | <b>MFLUCC 14-0105</b>  | MZ463114 | MZ463159 | MZ998937 | —        | This study                      |
| <i>Nemania plumbea</i>                           | JF TH-04-01            | DQ641634 | —        | DQ631952 | —        | Tang et al. 2007                |
| <i>Nemania primolutea</i>                        | <b>91102001 (HAST)</b> | EF026121 | —        | EF025607 | GQ844767 | Tang et al. 2007                |
| <i>Nemania serpens</i>                           | ATCC 16078             | AJ390431 | —        | —        | —        | Sanchez-Ballesteros et al. 2000 |
| <i>Nemania serpens</i> var.<br><i>macrospora</i> | ATCC 60822             | AJ390433 | —        | —        | —        | Sanchez-Ballesteros et al. 2000 |
| <i>Neoxylaria arengae</i>                        | <b>MFLUCC 15-0292</b>  | MT496747 | —        | —        | MF459058 | Konta et al. 2020               |
| <i>Neoxylaria juruensis</i>                      | 92042501 (HAST)        | GU322439 | —        | GQ495932 | GQ844825 | Konta et al. 2020               |
| <i>Obolarina dryophila</i>                       | MUCL 49882             | GQ428316 | GQ428316 | GQ428322 | KY624284 | Wendt et al. 2018               |
| <i>Podosordaria mexicana</i>                     | WSP176                 | GU324762 | —        | GQ844840 | GQ853039 | Hsieh et al. 2010               |
| <i>Podosordaria muli</i>                         | <b>WSP167</b>          | GU324761 | —        | GQ844839 | GQ853038 | Hsieh et al. 2010               |
| <i>Poronia pileiformis</i>                       | <b>WSP 88113001</b>    | GU324760 | —        | GQ502720 | GQ853037 | Hsieh et al. 2010               |
| <i>Poronia punctata</i>                          | <b>CBS 656.78</b>      | KT281904 | KY610496 | KX271281 | KY624278 | Wendt et al. 2018               |
| <i>Pyrenopolyporus hunteri</i>                   | <b>MUCL 52673</b>      | KY610421 | KY610472 | KU159530 | KY624309 | Wendt et al. 2018               |
| <i>Pyrenopolyporus laminosus</i>                 | <b>MUCL 53305</b>      | NR154296 | KY610485 | KC977292 | KY624303 | Wendt et al. 2018               |
| <i>Pyrenopolyporus nicaraguensis</i>             | CBS 117739             | AM749922 | KY610489 | AM749922 | KY624307 | Wendt et al. 2018               |
| <i>Rhopalostroma angolense</i>                   | CBS 126414             | KY610420 | KY610459 | KX271277 | KY624228 | Wendt et al. 2018               |
| <i>Rosellinia aquila</i>                         | MUCL 51703             | KY610392 | KY610460 | KX271253 | KY624285 | Wendt et al. 2018               |
| <i>Rosellinia buxi</i>                           | JDR 99                 | GU300070 | —        | GQ470228 | GQ844780 | Hsieh et al.2010                |
| <i>Rosellinia corticium</i>                      | MUCL 51693             | KY610393 | KY610461 | KX271254 | KY624229 | Wendt et al. 2018               |
| <i>Rosellinia lamprostoma</i>                    | YMJ 89112602           | EF026118 | —        | EF025604 | GQ844778 | Hsieh et al.2010                |
| <i>Rosellinia necatrix</i>                       | CBS 349.36             | AY909001 | KF719204 | KY624310 | —        | Vu et al. 2019                  |

|                                                      |                        |          |          |          |           |                      |
|------------------------------------------------------|------------------------|----------|----------|----------|-----------|----------------------|
| <i>Rosellinia sanctae-cruciana</i>                   | 90072903(HAST)         | GU292824 | —        | GQ470227 | GQ844777  | Hsieh et al.2010     |
| <i>Rostrophoxylon terebratum</i>                     | <b>CBS 119137</b>      | NR137677 | NG057759 | DQ840097 | DQ631954  | Wendt et al. 2018    |
| <i>Ruwenzoria pseudoannulata</i>                     | <b>MUCL 51394</b>      | NR137733 | NG059787 | KX271278 | KY624286  | Stadler et al. 2009  |
| <i>Sarcoxydon compunctum</i>                         | CBS 359.61             | KT281903 | KY610462 | KX271255 | KY624230  | Wendt et al. 2018    |
| <i>Stilbohoxylon elaeicola</i>                       | YMJ 173                | EF026148 | —        | EF025616 | GQ844826  | Hsieh et al.2010     |
| <i>Stilbohoxylon quisquiliarum</i>                   | YMJ 172                | EF026119 | —        | EF025605 | GQ853020  | Hsieh et al.2010     |
| <hr/>                                                |                        |          |          |          |           |                      |
| <i>Thamnomycetes dendroidea</i>                      | <b>CBS 123578</b>      | NR154472 | KY610467 | KY624313 | KY624232  | Stadler et al. 2010  |
| <i>Xylaria acuminatilongissima</i>                   | <b>95060506 (HAST)</b> | EU178738 | —        | GQ502711 | GQ853028  | Ju and Hsieh 2007    |
| <i>Xylaria acuta</i>                                 | AFTOL-ID 63            | DQ491493 | AY544676 | —        | DQ247797  | Lutzoni et al. 2004  |
| <i>Xylaria adscendens</i>                            | 570 (HAST)             | GU300101 | —        | GQ487708 | GQ844817  | Hsieh et al.2010     |
| <i>Xylaria aethiopica</i>                            | YMJ 1136               | MH790445 | —        | MH785221 | MH785222  | Fournier et al. 2018 |
| <i>Xylaria allantoidea</i>                           | 94042903 (HAST)        | GU324743 | —        | GQ502692 | GQ848356  | Hsieh et al.2010     |
| <i>Xylaria amphithele</i>                            | 529 (HAST)             | GU300083 | —        | GQ478218 | GQ844796  | Hsieh et al.2010     |
| <i>Xylaria apiculata</i>                             | EF6                    | MF927538 | —        | —        | —         | Poornima et al. 2017 |
| <i>Xylaria aphylli</i>                               | <b>MFLUCC 21-0059</b>  | MZ463116 | MZ463161 | MZ998939 | MZ613968  | This study           |
| <i>Xylaria apoda</i>                                 | 90080804 (HAST)        | GU322437 | —        | GQ495930 | GQ844823. | Hsieh et al.2010     |
| <i>Xylaria arbuscula</i>                             | CBS 126415             | KY610394 | KY610463 | KX271257 | KY624287  | Wendt et al. 2018    |
|                                                      | CBS 126416             | MH864102 | MH875561 | —        | —         | Vu et al. 2019       |
| <i>Xylaria arbuscula</i> var.<br><i>plenofissura</i> | 93082814 (HAST)        | GU339495 | —        | GQ478225 | GQ844804  | Hsieh et al.2010     |
| <i>Xylaria areolata</i>                              | 543 (HAST)             | GU300080 | —        | GQ478215 | GQ844793  | Hsieh et al.2010     |
| <i>Xylaria atrodivaricata</i>                        | <b>95052001 (HAST)</b> | EU178739 | —        | GQ502713 | GQ853030  | Ju and Hsieh 2007    |
| <i>Xylaria atosphaerica</i>                          | 91111214 (HAST)        | GU322459 | —        | GQ495953 | GQ848342  | Hsieh et al.2010     |
| <i>Xylaria badia</i>                                 | 5256                   | JQ862687 | JQ862643 | JX868543 | —         | Chen et al. 2013     |

|                                |                       |          |          |          |          |                       |
|--------------------------------|-----------------------|----------|----------|----------|----------|-----------------------|
| <i>Xylaria bambusicola</i>     | MFLUCC 11-0606        | KU940160 | KU863148 | —        | KU940183 | Dai et al. 2016       |
|                                | <b>WSP 205</b>        | NR153200 | —        | AY951762 | GQ844802 | Hsieh et al.2010      |
| <i>Xylaria berteri</i>         | 90112623 (HAST)       | GU324749 | —        | —        | —        | Hsieh et al.2010      |
|                                | JDR 256               | GU324750 | —        | GQ502698 | GQ848363 | Hsieh et al.2010      |
|                                | YMJ 95101511          | KC473562 | —        | KC473561 | —        | Fu et al. 2013        |
|                                | MFLUCC 14-0095        | MZ463112 | MZ463157 | MZ998935 | MZ490538 | This study            |
|                                | MFLUCC 14-0102        | MZ463113 | MZ463158 | MZ998936 | MZ490539 | This study            |
|                                | MFLUCC 14-0110        | MZ463111 | —        | MZ998934 | —        | This study            |
|                                | MFLUCC 14-0117        | MZ463130 | MZ463173 | MZ998949 | —        | This study            |
|                                | MFLUCC 14-0126        | MZ463128 | MZ463171 | MZ998947 | MZ970695 | This study            |
|                                | MFLUCC 14-0143        | MZ463144 | MZ463186 | MZ998963 | —        | This study            |
|                                | MFLUCC 14-0150        | MZ463147 | MZ463189 | MZ998966 | MZ970707 | This study            |
|                                | MFLUCC 14-0158        | MZ463146 | MZ463188 | MZ998965 | —        | This study            |
|                                | MFLUCC 21-0061        | MZ463127 | MZ463170 | MZ998946 | —        | This study            |
| <i>Xylaria brunneovinosa</i>   | <b>720 (HAST)</b>     | NR153201 | —        | GQ502706 | GQ853023 | Hsieh et al.2010      |
| <i>Xylaria castorea</i>        | <b>ATCC 76020</b>     | AF163030 | —        | —        | —        | Lee et al. 2000       |
|                                | PDD 600               | GU324751 | —        | GQ502703 | GQ853018 | Hsieh et al.2010      |
| <i>Xylaria cf. castorea</i>    | 91092303 (HAST)       | GU324752 | —        | GQ502704 | GQ853019 | Hsieh et al.2010      |
| <i>Xylaria cf. heliscus</i>    | 88113010 (HAST)       | GU324742 | —        | GQ502691 | GQ848355 | Hsieh et al.2010      |
| <i>Xylaria chaiyaphumensis</i> | <b>SWUF17-49.2</b>    | MT622775 | —        | —        | —        | Wangsawat et al. 2021 |
| <i>Xylaria chrysanthi</i>      | <b>MFLUCC 21-0014</b> | MZ463133 | MZ463176 | MZ998952 | MZ970697 | This study            |
| <i>Xylaria cirrata</i>         | <b>664 (HAST)</b>     | EU179863 | —        | GQ502707 | GQ853024 | Hsieh et al.2010      |
| <i>Xylaria coccophora</i>      | 786 (HAST)            | GU300093 | —        | GQ487701 | GQ844809 | Hsieh et al.2010      |
| <i>Xylaria cranioides</i>      | 226 (HAST)            | GU300075 | —        | GQ478210 | GQ844785 | Ju and Hsieh 2007     |

|                            |                       |          |          |          |          |                  |
|----------------------------|-----------------------|----------|----------|----------|----------|------------------|
| <i>Xylaria crozonensis</i> | 398 (HAST)            | GU324748 | —        | GQ502697 | GQ848361 | Hsieh et al.2010 |
| <i>Xylaria cubensis</i>    | GENT 159              | —        | —        | GQ502702 | GQ853017 | Hsieh et al.2010 |
|                            | 477 (HAST)            | —        | —        | GQ502699 | GQ848364 | Hsieh et al.2010 |
|                            | JDR 860               | GU991523 | —        | GQ502700 | GQ848365 | Hsieh et al.2010 |
| <i>Xylaria culleniae</i>   | JDR 189               | GU322442 | —        | GQ495935 | GQ844829 | Hsieh et al.2010 |
| <i>Xylaria curta</i>       | 494 (HAST)            | GU322444 | —        | GQ495937 | GQ844831 | Hsieh et al.2010 |
|                            | 92092022 (HAST)       | GU322443 | —        | GQ495936 | GQ844830 | Hsieh et al.2010 |
| <i>Xylaria cf. curta</i>   | GZAC O36L23           | MZ463122 | MZ463166 | MZ998942 | MZ690491 | This study       |
| <i>Xylaria cf. glebosa</i> | 431 (HAST)            | GU322462 | —        | GQ495956 | GQ848345 | Hsieh et al.2010 |
| <i>Xylaria dendrobii</i>   | <b>MFLUCC 14-0137</b> | MZ463140 | —        | MZ998959 | —        | This study       |
|                            | GZAC O6LA2            | MZ463148 | MZ463190 | MZ998967 | —        | This study       |
| <i>Xylaria digitata</i>    | 919 (HAST)            | GU322456 | —        | GQ495949 | GQ848338 | Hsieh et al.2010 |
| <i>Xylaria discolor</i>    | <b>YMJ 1280</b>       | JQ087405 | —        | JQ087414 | JQ087411 | Ju et al. 2012   |
| <i>Xylaria enterogena</i>  | 785 (HAST)            | GU324736 | —        | GQ502685 | GQ848349 | Hsieh et al.2010 |
| <i>Xylaria escharoidea</i> | <b>658 (HAST)</b>     | EU179864 | —        | GQ502709 | GQ853026 | Hsieh et al.2010 |
| <i>Xylaria feejeensis</i>  | JDR 180               | GU322453 | —        | GQ495946 | GQ848335 | Hsieh et al.2010 |
|                            | GZAC O30S21           | MZ463117 | MZ463162 | MZ998940 | MZ690489 | This study       |
| <i>Xylaria fimbriata</i>   | 491 (HAST)            | GU324753 | —        | GQ502705 | GQ853022 | Hsieh et al.2010 |
| <i>Xylaria fissilis</i>    | 367 (HAST)            | GU300073 |          | GQ470231 | GQ844783 | Hsieh et al.2010 |
| <i>Xylaria frustulosa</i>  | 92092010 (HAST)       | GU322451 | —        | GQ495944 | GQ844838 | Hsieh et al.2010 |
| <i>Xylaria globosa</i>     | 775 (HAST)            | GU324735 | —        | GQ502684 | GQ848348 | Hsieh et al.2010 |
| <i>Xylaria grammica</i>    | 5228                  | JQ862677 | JQ862638 | JX868538 | —        | Chen et al. 2013 |
|                            | 479 (HAST)            | GU300097 | —        | GQ487704 | GQ844813 | Hsieh et al.2010 |
|                            | 5151                  | JQ862665 | JQ862626 | JX868535 | —        | Chen et al. 2013 |

|                                 |                   |          |          |          |          |                       |
|---------------------------------|-------------------|----------|----------|----------|----------|-----------------------|
|                                 | BCC1002           | AB625411 | AB376679 | —        | —        | Okane et al. 2012     |
|                                 | MFLUCC 14-0093    | MZ463107 | MZ463154 | MZ613965 | —        | This study            |
|                                 | MFLUCC 14-0146    | MZ463139 | MZ463182 | MZ998958 | MZ970700 | This study            |
| <i>Hypoxylon griseobrunneum</i> | <b>CBS 331.73</b> | KY610402 | MH872399 | KC977303 | KY624300 | Wendt et al. 2018     |
| <i>Xylaria haemorrhoidalis</i>  | 89041207 (HAST)   | GU322464 | —        | GQ502683 | GQ848347 | Hsieh et al.2010      |
| <i>Xylaria hongkongensis</i>    | <b>GDGM 40058</b> | NR154905 | —        | —        | —        | Tang et al. 2013      |
|                                 | GZAC O32S24       | MZ463119 | MZ463164 | —        | MZ970702 | This study            |
| <i>Xylaria hypoxylon</i>        | <b>CBS 122620</b> | AM993141 | KY610495 | KX271279 | KY624231 | Persoh et al. 2009    |
| <i>Xylaria ianthinovelutina</i> | 553 (HAST)        | GU322441 |          | GQ495934 | GQ844828 | Hsieh et al.2010      |
| <i>Xylaria insolita</i>         | YMJ 99090301-1251 | MN655979 | —        | MN656983 | MN656981 | Hsieh et al. 2020     |
| <i>Xylaria intracolorata</i>    | 90080402 (HAST)   | GU324741 | —        | GQ502690 | GQ848354 | Hsieh et al.2010      |
| <i>Xylaria intraflava</i>       | 725 (HAST)        | EU179866 | —        | GQ502718 | GQ853035 | Ju and Hsieh 2007     |
| <i>Xylaria ischnostroma</i>     | SWUF18-22.1       | MT622788 | —        | MW459244 | —        | Wangsawat et al. 2021 |
| <i>Xylaria karyophthora</i>     | DRH059            | KY564220 | —        | —        | KY564216 | Husbands et al. 2017  |
| <i>Xylaria laevis</i>           | 95072910 (HAST)   | GU324747 | —        | GQ502696 | GQ848360 | Hsieh et al.2010      |
|                                 | 419 (HAST)        | GU324746 | —        | GQ502695 | GQ848359 | Hsieh et al.2010      |
|                                 | GZAC O33L12       | MZ463120 | MZ463165 | MZ998969 |          | This study            |
| <i>Xylaria liquidambaris</i>    | 93090701 (HAST)   | GU300094 | —        | GQ487702 | GQ844810 | Hsieh et al.2010      |
| <i>Xylaria longipes</i>         | <b>CBS 148.73</b> | KU683768 | —        | KU684204 | KU684280 | Vu et al. 2019        |
| <i>Xylaria longissima</i>       | <b>IRAN 2268C</b> | NR147567 | —        | —        | —        | Hashemi et al. 2015   |
| <i>Xylaria luteostromata</i>    | 508 (HAST)        | GU324739 | —        | GQ502688 | GQ848352 | Hsieh et al.2010      |
| <i>Xylaria mali</i>             | CBS 385.35        | AF163040 | MH867225 | KU684205 | KU684286 | Hsieh et al.2010      |
| <i>Xylaria meliacearum</i>      | JDR 148           | GU300084 | —        | GQ478219 | GQ844797 | Hsieh et al.2010      |
| <i>Xylaria melitensis</i>       | CS1223            | MW513723 | MW51376  | —        | —        | Fournier et al. 2021  |

|                                                             |                       |          |          |          |          |                          |
|-------------------------------------------------------------|-----------------------|----------|----------|----------|----------|--------------------------|
| <i>Xylaria microceras</i>                                   | 414 (HAST)            | GU300086 | —        | GQ478221 | GQ844799 | Hsieh et al.2010         |
| <i>Xylaria minima</i>                                       | <b>SWUF18-3.2</b>     | MT622789 | —        | MW459245 | —        | Wangsawat et al. 2021    |
| <i>Xylaria montagnei</i>                                    | 495 (HAST)            | GU322455 | —        | GQ495948 | GQ848337 | Hsieh et al.2010         |
| <i>Xylaria multiplex</i>                                    | 580 (HAST)            | GU300098 | —        | GQ487705 | GQ844814 | Hsieh et al.2010         |
| <i>Xylaria muscula</i>                                      | 520 (HAST)            | GU300087 | —        | GQ478222 | GQ844800 | Hsieh et al.2010         |
| <i>Xylaria necrophora</i>                                   | DMCC3829              | MT808616 | —        | MT812966 | MT812957 | Garcia-Aroca et al. 2021 |
| <i>Xylaria nigripes</i>                                     | 653 (HAST)            | GU324755 | —        | GQ502710 | GQ853027 | Hsieh et al.2010         |
| <i>Xylaria ochraceostroma</i>                               | <b>401(HAST)</b>      | EU179869 | —        | GQ502717 | GQ853034 | Ju and Hsieh 2007        |
| <i>Xylaria oligotoma</i>                                    | 784 (HAST)            | GU300092 | —        | GQ487700 | GQ844808 | Hsieh et al.2010         |
| <i>Xylaria ophiopoda</i>                                    | 93082805 (HAST)       | GU322461 | —        | GQ495955 | GQ848344 | Hsieh et al.2010         |
| <i>Xylaria oxyacanthae</i>                                  | JDR 859               | GU322434 | —        | GQ495927 | GQ844820 | Hsieh et al.2010         |
| <i>Xylaria palmicola</i>                                    | 604 (PDD)             | GU322436 | —        | GQ495929 | GQ844822 | Hsieh et al.2010         |
| <i>Xylaria papulis</i><br>(= <i>Xylaria hongkongensis</i> ) | 5118                  | JX868517 | JQ862616 | JX868529 | —        | Chen et al. 2013         |
| <i>Xylaria phyllocharis</i>                                 | 528 (HAST)            | GU322445 | —        | GQ495938 | GQ844832 | Hsieh et al.2010         |
| <i>Xylaria plebeja</i>                                      | 91122401 (HAST)       | GU324740 | —        | GQ502689 | GQ848353 | Hsieh et al.2010         |
| <i>Xylaria polymorpha</i>                                   | MUCL 49884            | KY610408 | KY610464 | KX271280 | KY624288 | Wendt et al. 2018        |
| <i>Xylaria reevesiae</i>                                    | HMH-2010g             | GU322435 | —        | GQ495928 | GQ844821 | Hsieh et al.2010         |
| <i>Xylaria regalis</i>                                      | 920 (HAST)            | GU324745 | —        | GQ502694 | GQ848358 | Hsieh et al.2010         |
| <i>X. reinkingii</i> var. <i>microspora</i>                 | <b>SWUF17-19.1</b>    | MT622769 | —        | MW459234 | —        | Wangsawat et al. 2021    |
| <i>Xylaria ripicola</i>                                     | <b>KH KA11-0060-1</b> | NR153251 | —        | —        | KU554696 | Kim et al. 2016          |
| <i>Xylaria schweinitzii</i>                                 | 92092023 (HAST)       | GU322463 | —        | GQ495957 | GQ848346 | Hsieh et al.2010         |
| <i>Xylaria scuposa</i>                                      | 497 (HAST)            | GU322458 | —        | GQ495952 | GQ848341 | Hsieh et al.2010         |
| <i>Xylaria sicula</i> f. <i>major</i>                       | 90071613 (HAST)       | GU300081 | MH869355 | GQ478216 | GQ844794 | Vu et al. 2019           |

|                               |                          |          |          |          |          |                       |
|-------------------------------|--------------------------|----------|----------|----------|----------|-----------------------|
| <i>Xylaria sihanonthis</i>    | <b>SWUF18-1.3</b>        | MT622785 | —        | MW459242 | —        | Wangsawat et al. 2021 |
| <i>Xylaria spinulosa</i>      | <b>GZUCC13016</b>        | —        | —        | KM236099 | KM236098 | Li et al.2017         |
| <i>Xylaria striata</i>        | 304 (HAST)               | GU300089 | —        | GQ478224 | GQ844803 | Hsieh et al.2010      |
| <i>Xylaria subescharoidea</i> | <b>YMJ 99060401-1188</b> | MN655980 | —        | MN656984 | MN656982 | Hsieh et al.2020      |
| <i>Xylaria subintraflava</i>  | <b>SWUF16-4.3</b>        | MT622762 | —        | MW459230 | —        | Wangsawat et al. 2021 |
| <i>Xylaria subtropicalis</i>  | <b>X1</b>                | MG013556 | MG013566 | —        | MG013547 | Chacón et al. 2019    |
| <i>Xylaria telfairii</i>      | 421 (HAST)               | GU324737 | —        | GQ502686 | GQ848350 | Hsieh et al.2010      |
| <i>Xylaria tentaculata</i>    | KA13-1325                | KM077164 | —        | —        | —        | Kim et al. 2016       |
| <i>Xylaria thienhirunae</i>   | <b>SWUF17-44.1</b>       | MT622771 | —        | —        | —        | Wangsawat et al. 2021 |
| <i>Xylaria tuberosides</i>    | 475 (HAST)               | GU300074 | —        | GQ478209 | GQ844784 | Hsieh et al.2010      |
| <i>Xylaria venosula</i>       | 94080508 (HAST)          | EF026149 | —        | EF025617 | GQ844806 | Ju et al.2007         |
|                               | MFLUCC 14-0114           | MZ463129 | MZ463172 | MZ998948 | —        | This study            |
|                               | MFLUCC 21-0013           | MZ463126 | MZ463169 | MZ998945 | MZ970694 | This study            |
|                               | MFLUCC 21-0015           | MZ463136 | MZ463179 | MZ998955 | MZ970704 | This study            |
|                               | MFLUCC 21-0016           | MZ463132 | MZ463175 | MZ998951 | MZ970696 | This study            |
|                               | MFLUCC 21-0017           | MZ463145 | MZ463187 | MZ998964 | MZ970701 | This study            |
| <i>Xylaria venustula</i>      | 88113002 (HAST)          | GU300091 | —        | GQ487699 | GQ844807 | Hsieh et al.2010      |
| <i>Xylaria vinacea</i>        | <b>SWUF18-2.1</b>        | MT622781 | —        | MW459239 | —        | Wangsawat et al. 2021 |
| <i>Xylaria vivanii</i>        | HMH-2010h                | GU322438 | —        | GQ495931 | GQ844824 | Hsieh et al.2010      |
| Xylariaceae sp.               | MFLUCC 14-0141           | MZ463142 | MZ463184 | MZ998961 | —        | This study            |
